# Supplementary material
Source: PubMed Central journal article supplement (PMC7469916)
Supplement: NIHMS1622542-supplement-SM.pdf [file NIHMS1622542-supplement-SM.pdf]

## Supporting Information

### Polyethyleneimine-Coated Manganese Oxide Nanoparticles for Targeted Tumor PET/MR Imaging

Jingyi Zhu <sup>a,b,§</sup>, Hongsheng Li <sup>a,§</sup>, Zhijuan Xiong <sup>c</sup>, Mingwu Shen <sup>c</sup>, Peter S. Conti <sup>a</sup>,

Xiangyang Shi <sup>b,c,\*</sup>, Kai Chen <sup>a,\*</sup>

<sup>a</sup> Molecular Imaging Center, Department of Radiology, Keck School of Medicine, University of Southern California, Los Angeles, CA 90033, USA

<sup>b</sup> State Key Laboratory for Modification of Chemical Fibers and Polymer Materials, College of Materials Science and Engineering, Donghua University, Shanghai 201620, China

<sup>c</sup> College of Chemistry, Chemical Engineering and Biotechnology, Donghua University, Shanghai 201620, China

---

\* Corresponding authors:

College of Chemistry, Chemical Engineering and Biotechnology, Donghua University, Shanghai 201620, China. Tel: +86-21-67792656; Fax: +86-21-67792306 804; E-mail address: xshi@dhu.edu.cn (X. Shi).

Molecular Imaging Center, Department of Radiology, Keck School of Medicine, University of Southern California, Los Angeles, CA 90033, USA. Tel: +1-323-442-3858; Fax: +1-323-442-3253; E-mail address: chen kai@med.usc.edu (K. Chen).

§J.Z. and H.L. contributed equally to this work.

### **Additional Experimental Details:**

**Synthesis of the NOTA-FA-FI-PEG-PEI-Ac-Mn<sub>3</sub>O<sub>4</sub> NPs.** We used a solvothermal method to prepare the PEI-NH<sub>2</sub>-Mn<sub>3</sub>O<sub>4</sub> NPs. In detail, Mn(acac)<sub>2</sub> (253.0 mg) was dissolved in 10 mL DEG reacted with PEI (100 mg) by magnetic stirring. After 1 h continuous stir of mixture in air, the mixture was autoclaved (KH-50 Autoclave, Shanghai Yuying Instrument Co., Ltd., Shanghai) for 24 h in a sealed vessel (50 mL) under a 2 bar gauge pressure at 180°C. Then the mixture was cooled down to room temperature. Black precipitate was collected through centrifugation at 8000 rpm for 5 min, followed by dialysis to purify the formed PEI-NH<sub>2</sub>-Mn<sub>3</sub>O<sub>4</sub> NPs. Briefly, the reaction mixture was extensively dialyzed against water (nine times, 8 L) through a 14,000 MWCO membrane for 3 days to remove the excess of reactants, followed by lyophilization to acquire the PEI-NH<sub>2</sub>-Mn<sub>3</sub>O<sub>4</sub> NPs.

FA with 2 molar equivalents of NH<sub>2</sub>-PEG-COOH (26.484 mg, 0.060 mmol) dissolved in 3 mL DMSO was mixed with a 3 mL of DMSO solution containing EDC (11.502 mg, 0.060 mmol), and the reaction mixture was stirred for 3 h to activate the carboxylic acid group of FA. The activated FA was then added to a 5 mL of DMSO solution containing NH<sub>2</sub>-PEG-COOH (60 mg, 0.030 mmol) under vigorous magnetic stirring at room temperature and reacted for 24 h. The reaction mixture was dialyzed against phosphate buffered saline (PBS, 3 times, 4 L) and water (3 times, 4 L) with a 1 000 MWCO membrane for 3 days for purification, followed by lyophilization to obtain the powder of FA-PEG-COOH.

Then the obtained PEI-NH<sub>2</sub>-Mn<sub>3</sub>O<sub>4</sub> NPs (50.53 mg, 0.00151 mmol) were dissolved in 5.0 mL DMSO to mix with a DMSO solution of 7 molar equivalents of FI (3.0 mL, 4.12 mg, 0.01058 mmol), and reacted for 24 h under magnetic stirring at room temperature. NOTA-NHS (11.99 mg,

0.01816 mmol, in 3.0 mL DMSO) with 12 molar equivalents of the PEI-NH<sub>2</sub>-Mn<sub>3</sub>O<sub>4</sub> NPs was then added into the mixture of the FI-PEI-NH<sub>2</sub>-Mn<sub>3</sub>O<sub>4</sub> NPs and stirred continuously for 24 h to form the NOTA-FI-PEI-NH<sub>2</sub>-Mn<sub>3</sub>O<sub>4</sub> NPs. PEGylated FA was modified on the surface of the NOTA-FI-PEI-NH<sub>2</sub>-Mn<sub>3</sub>O<sub>4</sub> NPs subsequently. Briefly, FA-PEG-COOH (74.96 mg, in 5.0 mL DMSO) with 22 molar equivalents of the PEI-NH<sub>2</sub>-Mn<sub>3</sub>O<sub>4</sub> NPs was activated with EDC (114.0 mg, in 5.0 mL DMSO) for 3 h, then mixed with the formed NOTA-FI-PEI-NH<sub>2</sub>-Mn<sub>3</sub>O<sub>4</sub> NPs through stirring for 3 days to provide the raw product of the NOTA-FA-FI-PEG-PEI-NH<sub>2</sub>-Mn<sub>3</sub>O<sub>4</sub> NPs. The raw product the NOTA-FA-FI-PEG-PEI-NH<sub>2</sub>-Mn<sub>3</sub>O<sub>4</sub> NPs were subsequently acetylated and purified *via* dialysis. In detail, triethylamine (742 μL) was added into the NOTA-FA-FI-PEG-PEI-NH<sub>2</sub>-Mn<sub>3</sub>O<sub>4</sub> NPs solution, then completely mixed and stirred for 30 min. Excess acetic anhydride (420 μL, 5 molar equivalents of PEI terminal amines) was then added dropwise into the above mixture solution. The reaction continued for 24 h. The final reaction mixture was purified and lyophilized to obtain the NOTA-FA-FI-PEG-PEI-Ac-Mn<sub>3</sub>O<sub>4</sub> NPs according to the procedure similar to the purification of FA-PEG-COOH, except that the dialysis membrane with MWCO of 14 000 was used. In order to compare with the NOTA-FA-FI-PEG-PEI-Ac-Mn<sub>3</sub>O<sub>4</sub> NPs, the NOTA-FI-PEG-PEI-Ac-Mn<sub>3</sub>O<sub>4</sub> NPs without FA conjugation was also synthesized as a control.

***In vitro* biocompatibility test.** In order to assess the biocompatibility of the NOTA-FA-FI-PEG-PEI-Ac-Mn<sub>3</sub>O<sub>4</sub> NPs and the NOTA-FI-PEG-PEI-Ac-Mn<sub>3</sub>O<sub>4</sub> NPs, MTT assay was utilized to test the cytotoxicity of the NOTA-FA-FI-PEG-PEI-Ac-Mn<sub>3</sub>O<sub>4</sub> NPs and the NOTA-FI-PEG-PEI-Ac-Mn<sub>3</sub>O<sub>4</sub> NPs towards HeLa cells *in vitro*. Briefly, HeLa cells (1×10<sup>4</sup> cells/well) were seeded into a 96-well plate. After 24 h incubation to bring the cells to confluence, the medium was replaced with 200 μL fresh medium containing the

NOTA-FA-FI-PEG-PEI-Ac-Mn<sub>3</sub>O<sub>4</sub> NPs or the NOTA-FI-PEG-PEI-Ac-Mn<sub>3</sub>O<sub>4</sub> NPs with different Mn concentrations (0, 5, 10, 25, 50, and 100 µg/mL, respectively). After 24 h incubation, an MTT solution (20 µL in PBS, 5 mg/mL) was added to each well and the cells were incubated for another 4 h at 37°C. After that, the medium in each well was removed, and DMSO (200 µL) was added to dissolve the formed formazan crystals. The assays were carried out according to the manufacturer's instructions at 570 nm using a Thermo Scientific Multiskan MK3 ELISA reader (Thermo Scientific, Waltham, MA). For each sample, mean and standard deviation for the triplicate wells were analyzed.

Leica DM IL LED inverted phase contrast microscope was also utilized to observe the cell morphology after incubation with the NOTA-FA-FI-PEG-PEI-Ac-Mn<sub>3</sub>O<sub>4</sub> NPs or the NOTA-FI-PEG-PEI-Ac-Mn<sub>3</sub>O<sub>4</sub> NPs at different Mn concentrations (0, 5, 10, 25, 50, and 100 µg/mL, respectively) for 24 h. For all samples, 200× magnification was set.

**Confocal microscopy.** The targeting specificity of the NOTA-FA-FI-PEG-PEI-Ac-Mn<sub>3</sub>O<sub>4</sub> NPs by HeLa cells was further evaluated by confocal microscopy (Carl Zeiss LSM 700, Jena, Germany) according to our previous reports<sup>1-2</sup>. Briefly, cover slips with a diameter of 14 mm were pretreated with 5% HCl, 30% HNO<sub>3</sub>, and 75% alcohol and then fixed in a 12-well culture plate. HeLa cells ( $8 \times 10^4$ ) were seeded into each well with 1 mL fresh medium and cultured at 37°C and 5% CO<sub>2</sub> overnight to allow the cells to attach onto the cover slips. Then, the medium was replaced with 1 mL fresh medium containing PBS (control), the NOTA-FA-FI-PEG-PEI-Ac-Mn<sub>3</sub>O<sub>4</sub> NPs or the NOTA-FI-PEG-PEI-Ac-Mn<sub>3</sub>O<sub>4</sub> NPs at different Mn concentrations (5 and 10 µg/mL, respectively). After 4 h incubation at 37°C and 5% CO<sub>2</sub>, the cells were rinsed with PBS for 3 times, fixed with glutaraldehyde (2.5%) for 20 min at 4°C, and counterstained with Hoechst 33342 (1 µg/mL) for 20 min at 37°C using a standard procedure. The FI fluorescence was excited with a 488 nm argon blue laser, and the emission was collected through a 505-525 nm barrier filter. The optical section thickness was set at 5 µm. 63× oil-immersion objective lens was utilized to scan all samples.

**Table S1.**  $\zeta$  potential and hydrodynamic size of the NOTA-FA-FI-PEG-PEI-Ac-Mn<sub>3</sub>O<sub>4</sub> NPs and the NOTA-FI-PEG-PEI-Ac-Mn<sub>3</sub>O<sub>4</sub> NPs.

| Sample                                                   | $\zeta$ potential<br>(mV) | Hydrodynamic<br>size (nm) | Polydispersity<br>index |
|----------------------------------------------------------|---------------------------|---------------------------|-------------------------|
| NOTA-FI-PEG-PEI-Ac-Mn <sub>3</sub> O <sub>4</sub> NPs    | 17.6 ± 1.9                | 249.9 ± 11.5              | 0.429                   |
| NOTA-FA-FI-PEG-PEI-Ac-Mn <sub>3</sub> O <sub>4</sub> NPs | 14.1 ± 1.6                | 476.5 ± 13.5              | 0.659                   |

**Table S2.** Decay-corrected biodistribution of the <sup>64</sup>Cu-NOTA-FA-FI-PEG-PEI-Ac-Mn<sub>3</sub>O<sub>4</sub> NPs and the <sup>64</sup>Cu-NOTA-FI-PEG-PEI-Ac-Mn<sub>3</sub>O<sub>4</sub> NPs at 18 h post-injection in tumor-bearing mice quantified by microPET imaging.<sup>a</sup>

| Tissue      | <sup>64</sup> Cu-NOTA-FA-FI-PEG-<br>PEI-Ac-Mn <sub>3</sub> O <sub>4</sub> NPs | <sup>64</sup> Cu-NOTA-FA-FI-PEG-<br>PEI-Ac-Mn <sub>3</sub> O <sub>4</sub> NPs + FA<br>blocking | <sup>64</sup> Cu-NOTA-FI-PEG-<br>PEI-Ac-Mn <sub>3</sub> O <sub>4</sub> NPs |
|-------------|-------------------------------------------------------------------------------|------------------------------------------------------------------------------------------------|----------------------------------------------------------------------------|
|             | percent injected dose/gram (%ID/g)                                            |                                                                                                |                                                                            |
| Tumor (T)   | 3.58 ± 0.28                                                                   | 1.58 ± 0.47                                                                                    | 1.49 ± 0.19                                                                |
| Muscle (M)  | 0.67 ± 0.27                                                                   | 0.57 ± 0.07                                                                                    | 0.41 ± 0.08                                                                |
| Liver (L)   | 12.10 ± 1.47                                                                  | 15.11 ± 0.53                                                                                   | 14.92 ± 0.92                                                               |
| Kidneys (K) | 13.21 ± 1.83                                                                  | 16.67 ± 0.65                                                                                   | 15.66 ± 0.58                                                               |
|             | tumor-to-normal tissue uptake ratio                                           |                                                                                                |                                                                            |
| T/M         | 5.35 ± 0.31                                                                   | 2.78 ± 0.68                                                                                    | 3.64 ± 0.16                                                                |
| T/L         | 0.30 ± 0.06                                                                   | 0.10 ± 0.03                                                                                    | 0.10 ± 0.01                                                                |
| T/K         | 0.28 ± 0.05                                                                   | 0.09 ± 0.02                                                                                    | 0.10 ± 0.01                                                                |

<sup>a</sup> The results are presented as mean ± SD (*n* = 4/group).

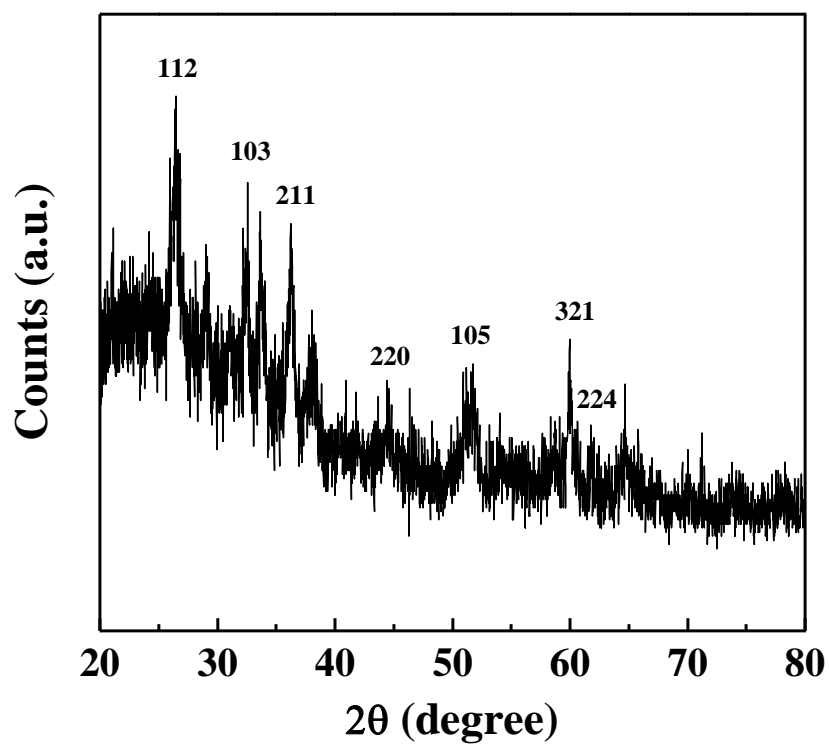

Figure S1. XRD pattern of the PEI-NH<sub>2</sub>-Mn<sub>3</sub>O<sub>4</sub> NPs.

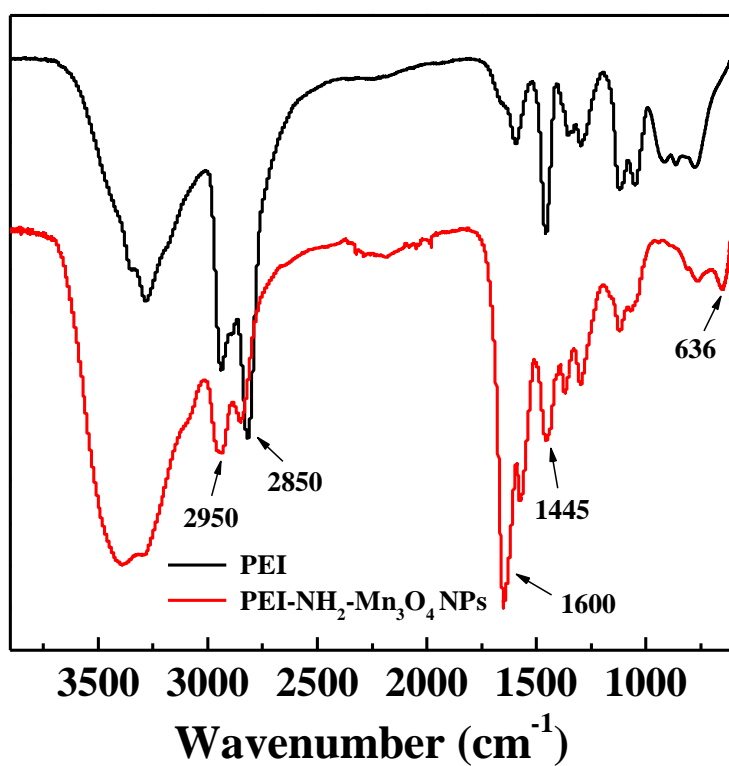

Figure S2. FTIR spectra of PEI and the PEI-NH<sub>2</sub>-Mn<sub>3</sub>O<sub>4</sub> NPs.

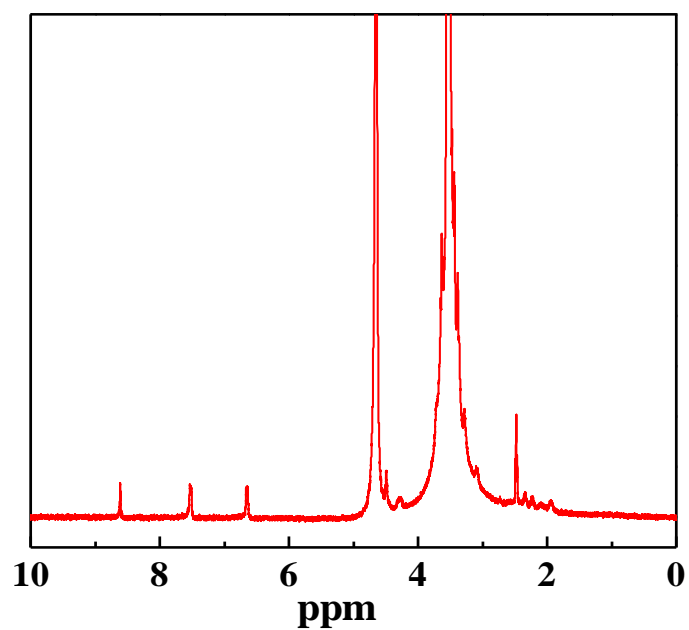

**Figure S3.**  $^1\text{H}$  NMR spectrum of FA-PEG-COOH.

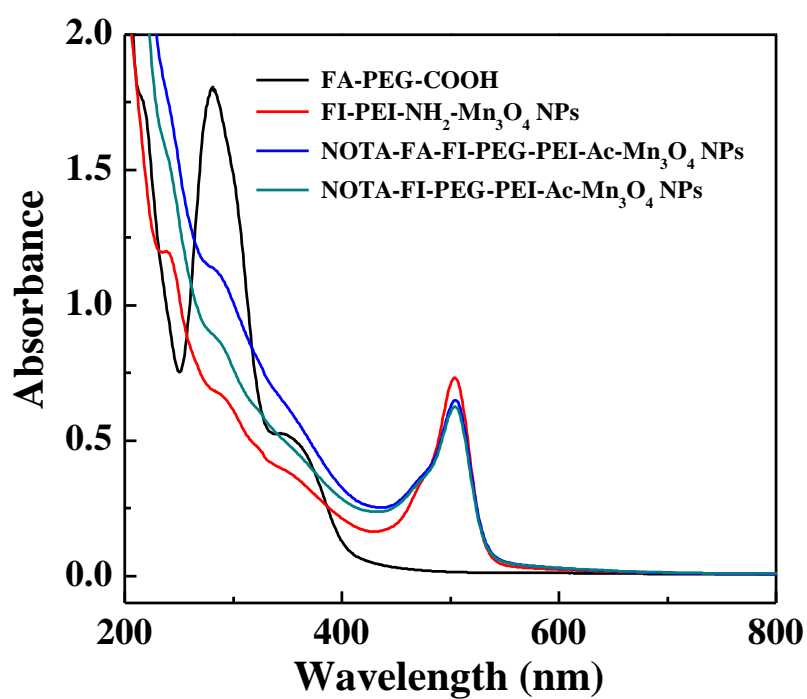

**Figure S4.** UV-Vis spectra of FA-PEG-COOH, the FI-PEI-NH<sub>2</sub>-Mn<sub>3</sub>O<sub>4</sub> NPs, the NOTA-FA-FI-PEG-PEI-Ac-Mn<sub>3</sub>O<sub>4</sub> NPs, and the NOTA-FI-PEG-PEI-Ac-Mn<sub>3</sub>O<sub>4</sub> NPs dispersed in water.

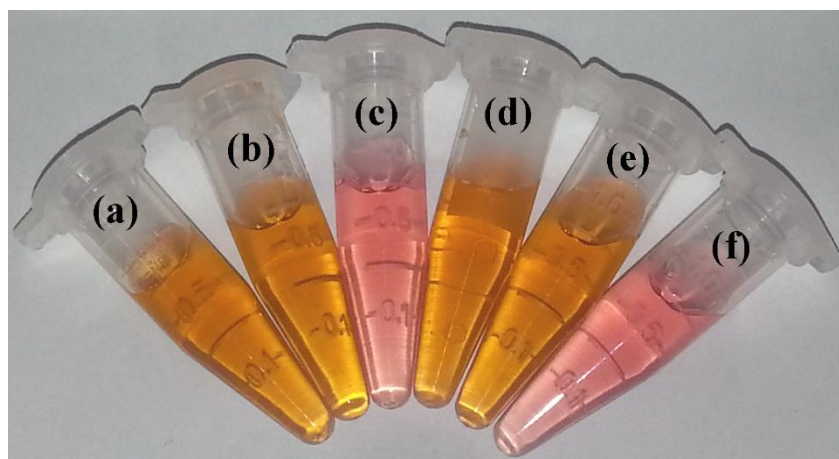

**Figure S5.** Photographs of the NOTA-FI-PEG-PEI-Ac-Mn<sub>3</sub>O<sub>4</sub> NPs (a-c) and the NOTA-FA-FI-PEG-PEI-Ac-Mn<sub>3</sub>O<sub>4</sub> NPs (d-f) dispersed in water (a, d), PBS (b, e), and cell culture medium (c, f) for three weeks.

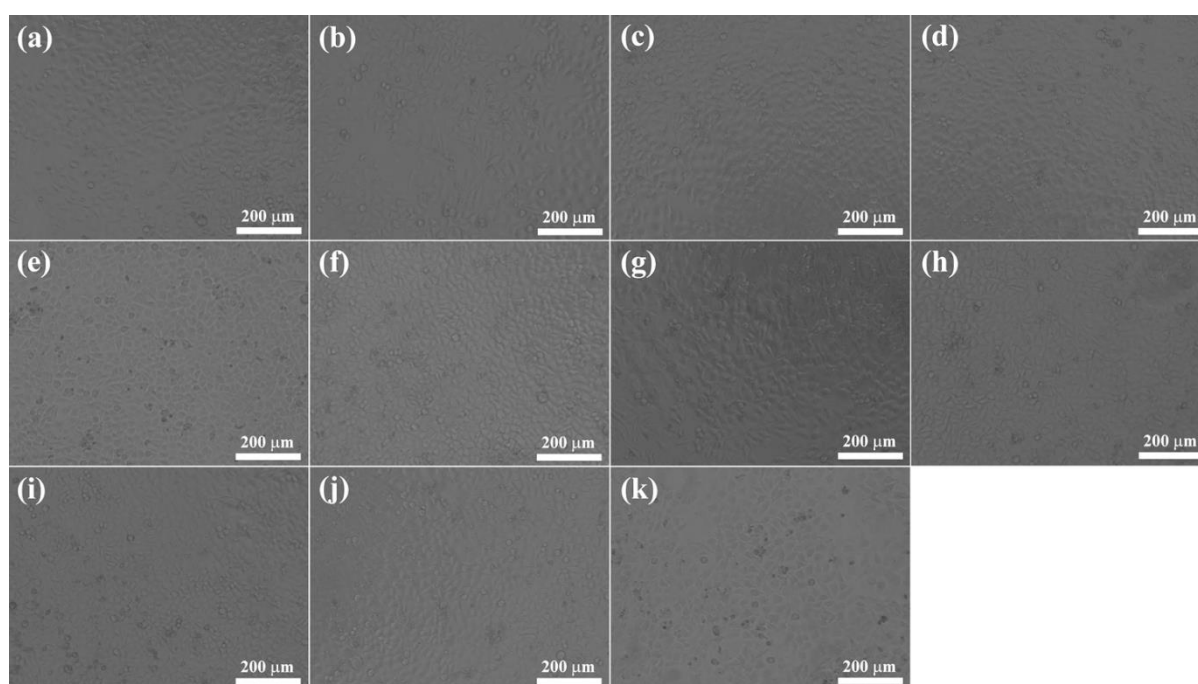

**Figure S6.** Micrographs of HeLa cells treated with PBS (a), the NOTA-FI-PEG-PEI-Ac-Mn<sub>3</sub>O<sub>4</sub> NPs at the Mn concentration of 5 (b), 10 (c), 25 (d), 50 (e), and 100 (f)  $\mu\text{g/mL}$ , the NOTA-FA-FI-PEG-PEI-Ac-Mn<sub>3</sub>O<sub>4</sub> NPs at the Mn concentration of 5 (g), 10 (h), 25 (i), 50 (j), and 100 (k)  $\mu\text{g/mL}$  for 24 h, respectively.



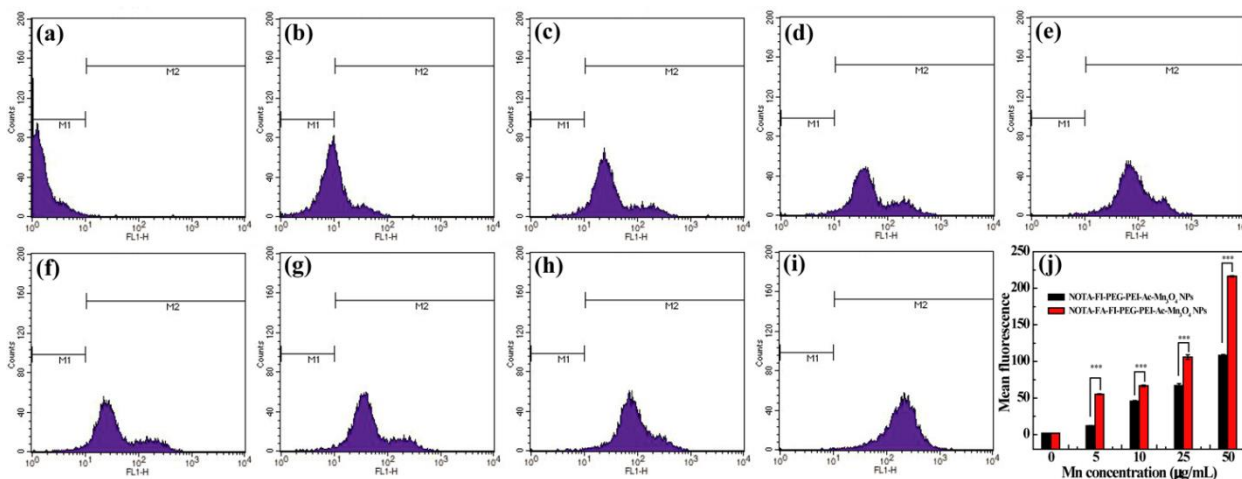

**Figure S7.** Flow cytometric analysis of HeLa cells treated with PBS (a), the NOTA-FI-PEG-PEI-Ac- $\text{Mn}_3\text{O}_4$  NPs at the Mn concentration of 5 (b), 10 (c), 25 (d) and 50 (e)  $\mu\text{g/mL}$  and the NOTA-FA-FI-PEG-PEI-Ac- $\text{Mn}_3\text{O}_4$  NPs at the Mn concentration of 5 (f), 10 (g), 25 (h) and 50 (i)  $\mu\text{g/mL}$ , respectively for 4 h. (j) The graph summarizes the binding of functionalized PEI nanomaterials with HeLa cells.

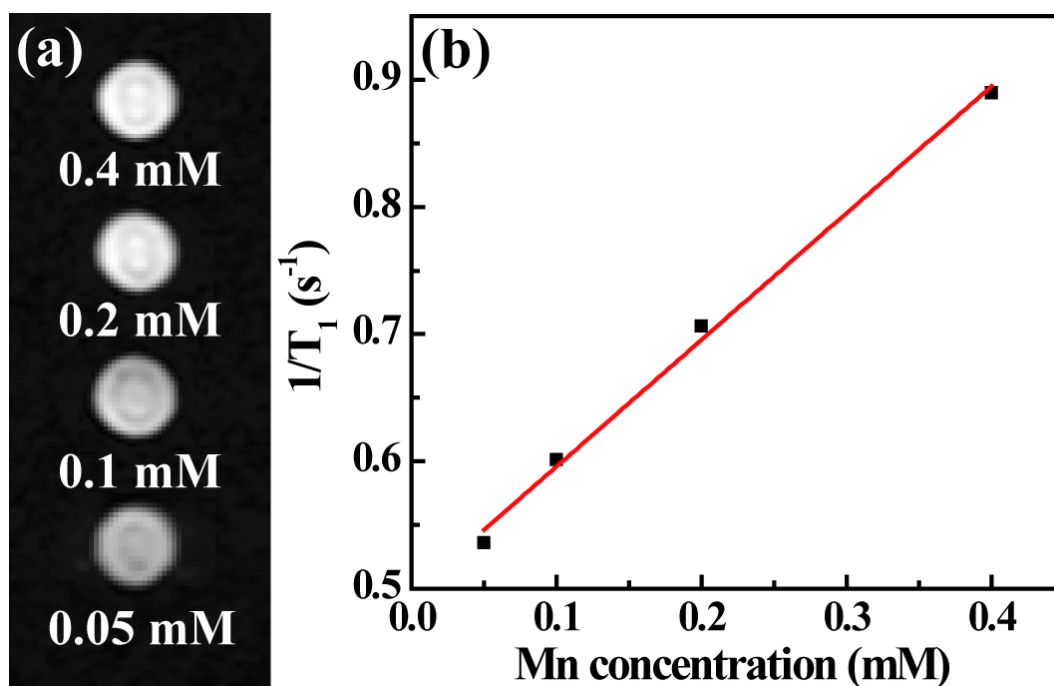

**Figure S8.**  $T_1$  MR images (a) and linear fitting of inverse  $T_1$  ( $1/T_1$ ) (b) of the NOTA-FA-FI-PEG-PEI-Ac- $\text{Mn}_3\text{O}_4$  NPs as a function of Mn concentration.

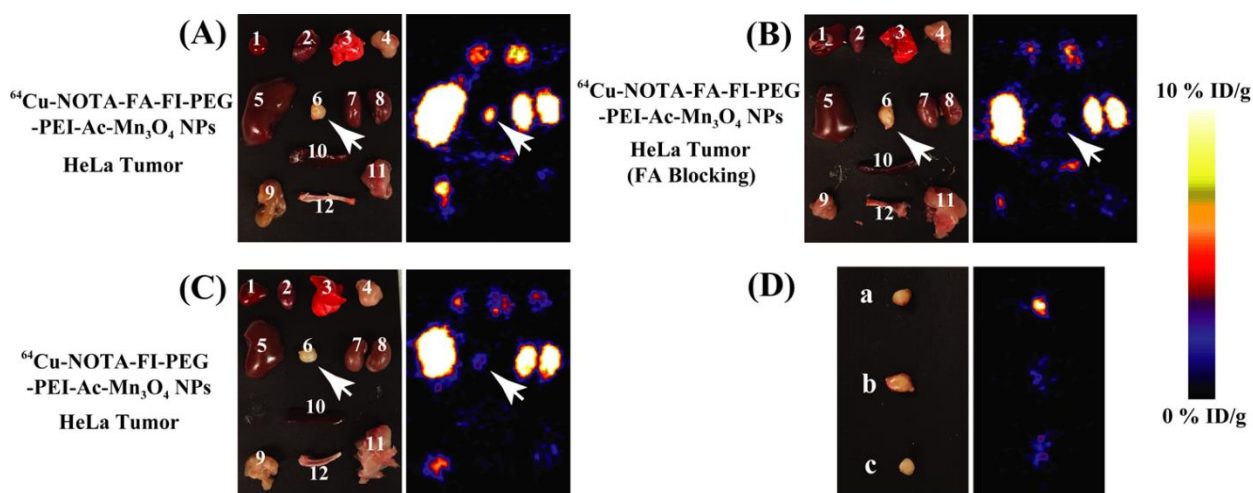

**Figure S9.** *Ex vivo* microPET imaging of tumor and normal tissues with the  $^{64}\text{Cu}$ -NOTA-FA-FI-PEG-PEI-Ac- $\text{Mn}_3\text{O}_4$  NPs in (A) HeLa tumor model, (B) FR-blocked HeLa tumor model, and (C) with the  $^{64}\text{Cu}$ -NOTA-FI-PEG-PEI-Ac- $\text{Mn}_3\text{O}_4$  NPs at 24 h post-injection: 1 blood, 2 heart, 3 lung, 4 pancreas, 5 liver, 6 tumor, 7,8 kidneys, 9 intestine, 10 spleen, 11 muscle, and 12 bone. (D) microPET imaging of HeLa tumors: (a) the  $^{64}\text{Cu}$ -NOTA-FA-FI-PEG-PEI-Ac- $\text{Mn}_3\text{O}_4$  NPs, (b) the  $^{64}\text{Cu}$ -NOTA-FA-FI-PEG-PEI-Ac- $\text{Mn}_3\text{O}_4$  NPs with FA-blocking, and (c) the  $^{64}\text{Cu}$ -NOTA-FI-PEG-PEI-Ac- $\text{Mn}_3\text{O}_4$  NPs, respectively. Tumors are indicated by arrows.

## References

- (1) Li, J.; He, Y.; Sun, W.; Luo, Y.; Cai, H.; Pan, Y.; Shen, M.; Xia, J.; Shi, X. Hyaluronic acid-Modified Hydrothermally Synthesized Iron Oxide Nanoparticles for Targeted Tumor MR Imaging. *Biomaterials* **2014**, *35*, 3666–3677.
- (2) Li, J.; Zheng, L.; Cai, H.; Sun, W.; Shen, M.; Zhang, G.; Shi, X. Polyethyleneimine-Mediated Synthesis of Folic Acid-Targeted Iron Oxide Nanoparticles for *In Vivo* Tumor MR Imaging. *Biomaterials* **2013**, *34*, 8382–8392.
